# Supplementary material
Source: publisher figshare collection journal article supplement (https://rs.figshare.com/ndownloader/files/12366932)
Supplement: Supplementary file 1 [file 12366932]

Archive with 1 entries (1 files):
- 12366932.out
